# Supplementary material
Source: ML conference proceedings conference paper supplement (https://proceedings.mlr.press/v164/wang22e.html)
Supplement: Supplementary file 2 [file wang22e-supp.zip]

Archive with 2 entries (2 files):
- Supplementary Materials/Appendix.pdf
- Supplementary Materials/readme.txt
